# Supplementary material for: Comorbidity and progression of late onset Alzheimer’s disease: A systematic review
Source: PubMed Central journal article supplement (PMC5417646; doi:10.1371/journal.pone.0177044), 2017-05-04
Supplement: pone.0177044.s005.pdf [file pone.0177044.s005.pdf]

## S5 Appendix. Quality Assessment.

| Author (year)               | Representative inclusion criteria | Comparable control group | Independent assessment of outcome | Independent assessment of comorbidity | Correction for age | Correction for education* | Correction for baseline progression | Follow up > 1 year | Follow-up rate > 60% at end of study | Total score |
|-----------------------------|-----------------------------------|--------------------------|-----------------------------------|---------------------------------------|--------------------|---------------------------|-------------------------------------|--------------------|--------------------------------------|-------------|
| Lyketsos et al. (1999)      | +                                 | +                        | +                                 | +                                     | ?                  | NA                        | NA                                  | NA                 | NA                                   | 80.00%      |
| Tekin et al. (2001)         | +                                 | +                        | +                                 | ?                                     | +                  | -                         | NA                                  | NA                 | NA                                   | 66.67%      |
| Doraiswamy et al. (2002)    | +                                 | -                        | +                                 | +                                     | +                  | +                         | NA                                  | NA                 | NA                                   | 83.33%      |
| Formiga et al. (2009)       | +                                 | +                        | +                                 | +                                     | +                  | ?                         | NA                                  | NA                 | NA                                   | 83.33%      |
| Oosterveld et al. (2014)    | +                                 | +                        | +                                 | +                                     | +                  | -                         | NA                                  | NA                 | NA                                   | 83.33%      |
| Aguero-Torres et al. (1998) | +                                 | +                        | +                                 | +                                     | +                  | +                         | +                                   | +                  | -                                    | 88.89%      |
| Boksay et al. (2005)        | -                                 | +                        | +                                 | ?                                     | ?                  | -                         | ?                                   | +                  | +                                    | 44.44%      |
| Solomon et al. (2011)       | +                                 | +                        | +                                 | +                                     | +                  | +                         | +                                   | +                  | +                                    | 100.00%     |
| Leoutsakos et al. (2012)    | +                                 | +                        | +                                 | +                                     | +                  | +                         | +                                   | +                  | -                                    | 88.89%      |
| Melis et al. (2013)         | +                                 | +                        | +                                 | +                                     | +                  | +                         | +                                   | +                  | +                                    | 100.00%     |
| Aubert et al. (2015)        | +                                 | +                        | +                                 | ?                                     | +                  | -                         | +                                   | +                  | +                                    | 77.78%      |

NA = not applicable

\* correction for education was only rated for studies examining cognition
